# Supplementary material for: Translation, Adaptation, and Validation of the Modified Thai Version of Champion’s Health Belief Model Scale (MT-CHBMS)
Source: MDPI journal article supplement (doi:10.3390/healthcare11010128), 2022-12-31
Supplement: s1 [file s1]

| Table S1. Univariate sample statistics of the Modified Thai version of CHBMS items |       |           |           |           |           |           |           |      |           |      |
|------------------------------------------------------------------------------------|-------|-----------|-----------|-----------|-----------|-----------|-----------|------|-----------|------|
|                                                                                    |       | N         | Minimum   | Maximum   | Mean      | SD        | Skewness  |      | Kurtosis  |      |
|                                                                                    |       | Statistic | Statistic | Statistic | Statistic | Statistic | Statistic | SE   | Statistic | SE   |
| 1                                                                                  | S1    | 130       | 1         | 5         | 2.50      | 1.122     | .150      | .212 | -.875     | .422 |
| 2                                                                                  | S2    | 130       | 1         | 5         | 2.41      | 1.098     | .346      | .212 | -.678     | .422 |
| 3                                                                                  | S3    | 130       | 1         | 5         | 2.57      | 1.092     | .092      | .212 | -.785     | .422 |
| 4                                                                                  | S4    | 130       | 1         | 5         | 2.44      | 1.107     | .350      | .212 | -.612     | .422 |
| 5                                                                                  | S5    | 130       | 1         | 5         | 2.38      | 1.073     | .345      | .212 | -.546     | .422 |
| 6                                                                                  | se1   | 130       | 1         | 5         | 3.58      | 1.105     | -.795     | .212 | .208      | .422 |
| 7                                                                                  | se2   | 130       | 1         | 5         | 3.14      | 1.002     | -.283     | .212 | -.033     | .422 |
| 8                                                                                  | se3   | 130       | 1         | 5         | 3.28      | 1.057     | -.577     | .212 | -.161     | .422 |
| 9                                                                                  | se4   | 130       | 1         | 5         | 3.15      | 1.089     | -.275     | .212 | -.540     | .422 |
| 10                                                                                 | se5   | 130       | 1         | 5         | 2.74      | 1.111     | .053      | .212 | -.809     | .422 |
| 11                                                                                 | se6   | 130       | 1         | 5         | 3.42      | 1.187     | -.534     | .212 | -.592     | .422 |
| 12                                                                                 | se7   | 130       | 1         | 5         | 2.72      | 1.214     | .364      | .212 | -.828     | .422 |
| 13                                                                                 | beb1  | 130       | 1         | 5         | 4.02      | .747      | -1.159    | .212 | 3.287     | .422 |
| 14                                                                                 | beb2  | 130       | 1         | 5         | 3.98      | .871      | -1.469    | .212 | 3.438     | .422 |
| 15                                                                                 | be3   | 130       | 1         | 5         | 4.00      | .872      | -1.355    | .212 | 2.529     | .422 |
| 16                                                                                 | be4   | 130       | 1         | 5         | 4.15      | .818      | -1.487    | .212 | 3.804     | .422 |
| 17                                                                                 | be5   | 130       | 1         | 5         | 4.08      | .813      | -1.374    | .212 | 3.474     | .422 |
| 18                                                                                 | be6   | 130       | 1         | 5         | 4.10      | .746      | -1.304    | .212 | 3.873     | .422 |
| 19                                                                                 | bm1   | 130       | 3         | 5         | 4.25      | .626      | -.246     | .212 | -.609     | .422 |
| 20                                                                                 | bm2   | 130       | 2         | 5         | 4.25      | .697      | -.671     | .212 | .358      | .422 |
| 21                                                                                 | bm3   | 130       | 2         | 5         | 4.29      | .731      | -.760     | .212 | .111      | .422 |
| 22                                                                                 | bm4   | 130       | 1         | 5         | 4.23      | .793      | -1.007    | .212 | 1.381     | .422 |
| 23                                                                                 | bm5   | 130       | 1         | 5         | 4.12      | .826      | -.904     | .212 | 1.007     | .422 |
| 24                                                                                 | bm6   | 130       | 2         | 5         | 4.21      | .775      | -.888     | .212 | .680      | .422 |
| 25                                                                                 | barb1 | 130       | 1         | 5         | 4.15      | .992      | -.993     | .212 | .315      | .422 |
| 26                                                                                 | barb2 | 130       | 1         | 5         | 3.49      | 1.080     | -.261     | .212 | -.554     | .422 |
| 27                                                                                 | barb3 | 130       | 1         | 5         | 4.20      | .952      | -1.125    | .212 | .854      | .422 |
| 28                                                                                 | barb4 | 130       | 1         | 5         | 3.99      | 1.060     | -.777     | .212 | -.465     | .422 |
| 29                                                                                 | barb5 | 130       | 1         | 5         | 3.78      | 1.064     | -.500     | .212 | -.653     | .422 |
| 30                                                                                 | barb6 | 130       | 1         | 5         | 4.01      | 1.045     | -.925     | .212 | .199      | .422 |
| 31                                                                                 | barm1 | 130       | 1         | 5         | 3.75      | 1.072     | -.529     | .212 | -.507     | .422 |
| 32                                                                                 | barm2 | 130       | 1         | 5         | 4.25      | .890      | -1.245    | .212 | 1.620     | .422 |
| 33                                                                                 | barm3 | 130       | 1         | 5         | 3.94      | 1.002     | -.814     | .212 | .260      | .422 |
| 34                                                                                 | barm4 | 130       | 1         | 5         | 3.68      | 1.086     | -.302     | .212 | -.902     | .422 |
| 35                                                                                 | barm5 | 130       | 1         | 5         | 3.45      | 1.195     | -.286     | .212 | -.920     | .422 |
| 36                                                                                 | beu1  | 130       | 1         | 5         | 4.20      | .687      | -.864     | .212 | 2.472     | .422 |
| 37                                                                                 | beu2  | 130       | 1         | 5         | 4.12      | .784      | -1.089    | .212 | 2.551     | .422 |
| 38                                                                                 | beu3  | 130       | 1         | 5         | 4.18      | .734      | -1.021    | .212 | 2.333     | .422 |

|    |      |     |   |   |      |       |        |      |        |      |
|----|------|-----|---|---|------|-------|--------|------|--------|------|
| 39 | beu4 | 130 | 1 | 5 | 4.10 | .888  | -1.346 | .212 | 2.740  | .422 |
| 40 | beu5 | 130 | 1 | 5 | 3.98 | .976  | -1.172 | .212 | 1.560  | .422 |
| 41 | beu6 | 130 | 1 | 5 | 4.04 | .893  | -1.072 | .212 | 1.340  | .422 |
| 42 | bau1 | 130 | 1 | 5 | 3.58 | 1.105 | -.480  | .212 | -.414  | .422 |
| 43 | bau2 | 130 | 1 | 5 | 4.10 | .905  | -.837  | .212 | .270   | .422 |
| 44 | bau3 | 130 | 1 | 5 | 3.98 | .923  | -.689  | .212 | -.014  | .422 |
| 45 | bau4 | 130 | 2 | 5 | 3.93 | .950  | -.467  | .212 | -.760  | .422 |
| 46 | bau5 | 130 | 1 | 5 | 3.44 | 1.175 | -.273  | .212 | -.942  | .422 |
| 47 | I1   | 130 | 1 | 5 | 3.89 | .838  | -1.402 | .212 | 3.144  | .422 |
| 48 | I2   | 130 | 1 | 5 | 3.75 | .836  | -.883  | .212 | .727   | .422 |
| 49 | I3   | 130 | 1 | 5 | 3.71 | .867  | -1.062 | .212 | .941   | .422 |
| 50 | I4   | 130 | 1 | 5 | 3.70 | .903  | -1.033 | .212 | .622   | .422 |
| 51 | I5   | 130 | 1 | 5 | 3.55 | 1.050 | -.819  | .212 | -.057  | .422 |
| 52 | I6   | 130 | 1 | 5 | 3.40 | 1.132 | -.774  | .212 | -.277  | .422 |
| 53 | I7   | 130 | 1 | 5 | 2.78 | 1.161 | -.022  | .212 | -1.162 | .422 |
| 54 | I8   | 130 | 1 | 5 | 3.46 | .966  | -.676  | .212 | -.166  | .422 |
| 55 | I9   | 130 | 1 | 5 | 3.15 | 1.191 | -.359  | .212 | -.974  | .422 |
| 56 | I10  | 130 | 1 | 5 | 3.46 | 1.094 | -.857  | .212 | -.064  | .422 |
| 57 | I11  | 130 | 1 | 5 | 3.48 | 1.028 | -.849  | .212 | .014   | .422 |
| 58 | M1   | 130 | 2 | 5 | 4.42 | .644  | -.826  | .212 | .476   | .422 |
| 59 | M2   | 130 | 3 | 5 | 4.58 | .582  | -1.023 | .212 | .071   | .422 |
| 60 | M3   | 130 | 3 | 5 | 4.42 | .608  | -.540  | .212 | -.599  | .422 |
| 61 | M4   | 130 | 3 | 5 | 4.50 | .560  | -.537  | .212 | -.754  | .422 |
| 62 | M5   | 130 | 2 | 5 | 4.28 | .685  | -.580  | .212 | -.127  | .422 |
| 63 | M6   | 130 | 1 | 5 | 3.91 | .968  | -.958  | .212 | .730   | .422 |
| 64 | M7   | 130 | 1 | 5 | 4.34 | .763  | -1.405 | .212 | 2.967  | .422 |
