# Supplementary material for: Translation, Adaptation, and Validation of the Modified Thai Version of Champion’s Health Belief Model Scale (MT-CHBMS)
Source: MDPI journal article supplement (doi:10.3390/healthcare11010128), 2022-12-31
Supplement: s1 [file s1]

Table S2. Error terms correlation

| No. | Pair of error terms | T-CHBMS  |       |           |         | MT- CHBMS |          |       |           |         |
|-----|---------------------|----------|-------|-----------|---------|-----------|----------|-------|-----------|---------|
|     |                     | Estimate | S.E.  | Est./S.E. | P-Value |           | Estimate | S.E.  | Est./S.E. | P-Value |
| 1   | S2-S1               | 0.506    | 0.052 | 9.688     | <.001   |           | 0.496    | 0.053 | 9.38      | <.001   |
| 2   | S4-S3               | 0.545    | 0.073 | 7.476     | <.001   |           | 0.546    | 0.074 | 7.355     | <.001   |
| 3   | SE3-SE2             | 0.518    | 0.066 | 7.855     | <.001   |           | 0.502    | 0.07  | 7.182     | <.001   |
| 4   | SE7-SE6             | 0.421    | 0.073 | 5.744     | <.001   |           | 0.417    | 0.074 | 5.661     | <.001   |
| 5   | BEB2-BEB1           | 0.614    | 0.05  | 12.286    | <.001   |           | 0.631    | 0.051 | 12.437    | <.001   |
| 6   | BM2-BM1             | 0.741    | 0.107 | 6.92      | <.001   |           | 0.711    | 0.119 | 5.953     | <.001   |
| 7   | BM5-BM4             | 0.385    | 0.068 | 5.63      | <.001   | BM5 - BM3 | -1.781   | 0.702 | -2.537    | 0.011   |
| 8   |                     |          |       |           |         | BM4 - BM1 | -0.31    | 0.141 | -2.198    | 0.028   |
| 9   | BARB2-BARB1         | 0.419    | 0.087 | 4.798     | <.001   |           | 0.401    | 0.085 | 4.697     | <.001   |
| 10  | BARB2-BARB4         | 0.412    | 0.169 | -2.434    | 0.015   |           | -0.495   | 0.183 | -2.704    | 0.007   |
| 11  | BARB3-BARB1         | 0.575    | 0.058 | 9.963     | <.001   |           | 0.579    | 0.061 | 9.464     | <.001   |
| 12  | BARM4-BARM3         | 0.44     | 0.083 | 5.276     | <.001   |           | 0.427    | 0.074 | 5.771     | <.001   |
| 13  | I2-I1               | 0.539    | 0.066 | 8.226     | <.001   |           | 0.526    | 0.07  | 7.491     | <.001   |
| 14  | I2-I9               | 0.357    | 0.083 | -4.321    | <.001   |           | -0.299   | 0.085 | -3.531    | <.001   |
| 15  | I4-I3               | 0.711    | 0.114 | 6.226     | <.001   |           | 0.631    | 0.051 | 12.437    | <.001   |
| 16  | I6-I5               | 0.858    | 0.023 | 38.118    | <.001   |           | 0.861    | 0.023 | 36.908    | <.001   |
| 17  | I6-I7               | 0.531    | 0.052 | 10.248    | <.001   |           | 0.555    | 0.053 | 10.532    | <.001   |
| 18  | I9-I1               | 0.538    | 0.106 | -5.083    | <.001   |           | -0.52    | 0.114 | -4.549    | <.001   |
| 19  | I9-I8               | 0.457    | 0.079 | 5.797     | <.001   |           | 0.479    | 0.076 | 6.267     | <.001   |
| 20  | I9-I11              | 0.648    | 0.069 | 9.381     | <.001   |           | 0.671    | 0.067 | 9.994     | <.001   |
| 21  | I11-I8              | 0.548    | 0.066 | 8.284     | <.001   |           | 0.561    | 0.065 | 8.643     | <.001   |

T-CHBMS = Thai version of the champion's health belief model scale, TM-CHBMS = modified Thai version of the champion's health belief model scale
